# Supplementary material for: Metabolic profile alterations in juvenile rats with bladder overactivity induced by short-term high-fructose intake
Source: PeerJ. 2025 Oct 13;13:e20186. doi: 10.7717/peerj.20186 (PMC12530204; doi:10.7717/peerj.20186)
Supplement: Supplemental Information 2 [file peerj-13-20186-s002.xlsx]

## Sheet: Figure 1
	Figure 1A			Figure 1B			Figure 1C			Figure 1D			Figure 1E			Figure 1F			Figure 1G			Figure 1H		Figure 1I		Figure 1J		Figure 1K							Figure 1L
	Body weight (g)			Blood cholesterol (mmol/L)			Blood triglycerides			Blood insulin			Blood glucose (mmol/L)			Blood fructose (mg/mL)			Blood F1P (ng/mL)			Intracellular calcium ion (mmol/gprot)		Bladder muscle tissue fructose (mg/mL)		Bladder muscle tissue F1P (ng/mL)		OGTT-0w (mmol/L)							OGTT-1w (mmol/L)
	0 w	1 w		0 w	1 w		0 w	1 w		0 w	1 w		0 w	1 w		0 w	1 w		0 w	1 w								Before gavage	30min	60min	90min	120min	180min		Before gavage	30min	60min	90min	120min	180min
Control group	100	141		2.66	1.36		2.66	1.36		1.95	3.73		5	4.3		0.08	0.03		28.1	27.05		0.05		0.24		26.48		3.1	6.9	6.7	2.9	3.7	3.7		3.8	5.7	4.5	4.5	4.6	2.6
Control group	112.1	183		3.12	1.53		3.12	1.53		1.95	2.32		7	5.3		0.17	0.07		23.78	23.76		0.08		0.22		28.99		3.2	6.8	5.8	3.9	3.1	3.5		2.9	5.8	4.4	4.1	3.8	2.7
Control group	115.2	167.5		2.77	1.71		2.77	1.71		1.99	2.65		6	4.9		0.2	0.65		22.33	27.86		0.07		0.21		29.45		3.1	6.9	7.4	4.9	2.7	3.4		2.2	5.1	3.8	3.7	4	3.6
Control group	105.5	145.5		1.97	3.68		1.97	3.68		2.63	3.52		6.2	5.6		0.21	0.59		22.45	24.78		0.12		0.36		26.56		2.1	6.4	9.7	6.9	4.2	3.4		2.5	6	4.7	4	4.9	3.2
Control group	109	155		2.16	3.96		2.16	3.96		2.51	2.31		6.5	7		0.17	0.47		23.08	24.95		0.16		0.24		29.2		2.9	6.1	8.7	6.9	4.2	3.7		3	4.9	4.1	3.9	4.2	3.7
Control group	104	158.5		2.03	3.26		2.03	3.26		2.9	2.54		5.6	6.8		0.21	0.29		26.63	24.43		0.11		0.28		28.5
Control group	115.8	159.5		1.99	1.87		1.99	1.87		2.19	4.61		6.6	6.8		0.12	0.5		27.54	26.42
Control group	117.6	155		2.84	2.16		2.84	2.16		2.31	3.67		6.5	5.6		0.18	0.57		29.65	28.12
Control group	113.4	172		2.67	2.59		2.67	2.59		1.99	8.96		6.3	6.3		0.24	0.45		27.65	24.5
Control group	117.4	153.5		3.09	2.19		3.09	2.19		2.23	4.12		5.5	5.9		0.11	0.36		28.42	30.6
Control group	114.2	154		2.63	3.65		2.63	3.65		2.15	2.34		7.6	6.3		0.2	0.5		26.52	27.41
Control group	115.1	168		2.98	2.12		2.98	2.12		2.65	7.64		5.8	6.7		0.16	0.42		30.23	28.02
Control group	107.9	167.5		1.95	1.95		1.95	1.95		2.47	6.45		6	6.5		0.24	0.33		20.52	27.65
Control group	112.6	159		2.08	1.36		2.08	1.36		2.1	2.37		6.3	6.6		0.18	0.34		22.64	23.56
Control group	109.4	149		1.98	2.06		1.98	2.06		1.99	3.45		7.2	7.3		0.19	0.45		28.56	26.3
Model group	109.3	161.5		2.42	1.32		2.42	1.32		2.79	3.65		8.2	5		0.18	0.07		25.76	26.17		0.28		0.26		24.13		3.3	6.4	10.3	5.2	1.9	3.9		1.3	5.4	4.5	3.8	2.2	3.3
Model group	108	141		2.42	1.73		2.42	1.73		1.95	3.91		6.8	6.3		0.13	0.71		27.49	27.65		0.81		0.45		25.58		3.5	6.3	9.6	4.2	2.2	3.6		2.3	5.9	4.1	3.4	2.8	3.4
Model group	105.2	136		2.5	1.36		2.5	1.36		2.1	3.83		6.3	5		0.24	0.1		25.71	28.48		0.07		0.16		30.45		2.8	5.9	5.9	5.3	2.3	3.5		2.9	4.9	4	3.1	3.4	3.2
Model group	115.1	160.5		2.41	1.18		2.41	1.18		2.28	10.52		6.7	5.7		0.17	0.7		25.03	28.18		0.26		0.26		26.48		2.2	6.7	6.7	6.3	4.1	3.3		3.1	5.9	4.4	3.6	2.5	4
Model group	107.4	156.5		2.54	1.45		2.54	1.45		2.42	18.84		6.7	5.2		0.17	0.71		28.94	27.81		0.43		0.32		26.56		3.1	6	6	6.2	3.9	2.9		2.5	5.8	4	3.3	3.5	2.9
Model group	113.6	136.5		2.66	1.78		2.66	1.78		1.93	4.2		6.5	6.2		0.17	0.73		35.54	29.78		0.36		0.2		27.62
Model group	108.5	136		1.88	1.44		1.88	1.44		1.99	2.36		5.4	5.2		0.26	0.5		26.7	27.16
Model group	109.3	146.5		1.9	1.75		1.9	1.75		2.14	2.02		5.7	5.9		0.17	0.15		28.65	28.65
Model group	111.8	142		2.33	1.2		2.33	1.2		1.95	4.71		6.6	6.1		0.2	0.23		24.41	27.43
Model group	127.2	158.5		2.56	1.98		2.56	1.98		2.01	2.99		6.2	5.7		0.17	0.65		25.12	26.81
Model group	113.5	153.5		2.31	2.52		2.31	2.52		2.42	7.81		6.4	5.3		0.11	0.32		24.56	28.6
Model group	115.7	160.5		2.6	1.8		2.6	1.8		1.97	6.6		5.5	8.2		0.13	0.29		28.1	30.45
Model group	108.1	142		2.39	1.78		2.39	1.78		2.01	2.48		7.1	5.6		0.22	0.35		26.7	25.63
Model group	121.2	162		2.56	1.51		2.56	1.51		1.95	2.73		6.4	5.4		0.2	0.4		26.52	24.7
Model group	106.4	138		2.39	1.84		2.39	1.84		2.02	2.14		5.2	5.2		0.21	0.36		24.5	28.3

## Sheet: Figure 2
	Voiding blot experiment, open field test and urodynamic test for Figure 2,Table 3,4 and 5
	Figure 2B		Figure 2C		Figure 2D		Figure 1B		Figure 2E		Figure 2F		Figure 2G		Figure 2H		Figure 2I		Figure 2J		Table 3		Table 3		Table 3		Table 4		Table 4		Table 4		Table 4		Table 4			Table 5		Table 5		Table 5		Table 5		Table 5		Table 5
Groups	The number of urine imprint points		Water intake per 5 h		Feed intake per 24 hours		Volume of urine (µL)		Total distance of activity (cm)		Time of activity(s)		Average speed (cm/s)
Control group	10		7.65		1.32		120		1110.8		121.24		2.31
Control group	8		5.36		0.87		640		428.54		49.63		0.89
Control group	9		6.48		0.98		420		113.25		22		0.24
Control group	10		5.65		0.64		675		412.99		82.99		0.86
Control group	4		7.32		1.13		810		176.21		66.45		0.37
Control group	7		4.51		0.78		420		1963.05		186.32		4.09
Control group	3		3.11		1.05		365		1049.6		111.19		2.19
Control group	6		3.88		0.64		640		781.45		95.35		0.78
Control group	3		6.11		0.85		170		641.35		83.67		1.98
Control group	7		3.46		0.44		680		1221.65		115.78		2.11
Control group	10		4.39		0.95		540		1345.4		160.85		0.78
Control group	5		4.64		1.08		390		564.45		56.84		1.45
Control group	7		5.67		1.07		270		288.32		114.29		0.6
Control group	8		4.35		1.1		1200		272.92		70.74		0.57
Control group	12		6.67		1.23		540		377.29		89.68		0.79
Model group	2		3.67		1.24		680		3655.16		289.62		7.61
Model group	3		6.67		1.05		340		1049.6		111.19		2.19
Model group	7		6.67		0.99		190		3881.21		309.16		8.09
Model group	14		8.65		1.25		810		3763.75		260.88		7.84
Model group	17		5.12		1.23		175		2536.39		217.28		5.28
Model group	10		4.32		1.08		335		6230.7		394.88		12.98
Model group	4		5.21		1.32		240		4688.46		369.36		9.77
Model group	11		4.35		1.15		1410		3983.67		321.29		8.3
Model group	13		7.36		0.84		320		5037.77		329.99		10.5
Model group	18		6.54		0.86		1140		4082.88		356.11		8.51
Model group	9		7.67		1.1		370		3944.04		329.35		8.22
Model group	10		8.7		1.11		230		3476.02		269.3		7.24
Model group	9		7.92		1.15		530		4193.74		354.73		8.74
Model group	5		8.17		0.87		560		3459.02		290.73		7.21
Model group	4		10.02		0.78		35		4905.96		360.42		10.22
[truncated: 2 more columns]

## Sheet: Figure 3
	Figure 3A		Figure 3B		Figure 3C		Figure 3D		Figure 3E		Figure 3F		Figure 3H		Figure 3I		Figure 3J
Groups	Bladder weight		Bladder capacity(ml)		Intravesical pressure(cmH2O)		Interval between contractions during filling phase (s)		Contraction amplitude during filling phase(cmH2O)		Maximum infusion volume (ml)		Maximum bladder pressure during filling phase (cmH2O)		Average bladder pressure during filling phase (cmH2O)		Amplitude of cessation of perfusion contraction (cmH2O)
Control group	82.3		0.4		27		11.58		4.15		0.6		60.95		26.98		8.39
Control group	78.5		0.4		38		13.3		3.87		0.9		56.31		28.87		18.99
Control group	62.8		0.4		27		30		0		1.2		45.13		38.71		2.38
Control group	57.9		0.8		35		28		2		1		45.86		38.75		3.1
Control group	55.6		1.1		56		25.36		2.8		1.5		41.22		25.3		4.22
Control group	61.6		0.9		35		31.25		3.15		1.1		53.65		31.23		10.54
Control group	58.6		0.7		53		15.63		4.2		0.6		48.63		29.12		9.56
Control group	59.7		0.8		36		23.75		1.52		0.9		39.52		30.12		11.25
Control group	65.7		0.7		80		27		2.34		0.7		27.56		28.45		9.65
Control group	63.4		0.6		32		26.5		1.15		0.9		45.62		30.45		8.56
Control group	65.1		0.9		56		27.3		4.56		1		55.61		31.54		10.11
Control group	70.5		0.6		26		12.89		5.61		0.8		57.54		29.45		6.51
Control group	71.7		0.6		30		18.96		3.85		0.5		34.56		21.58		4.52
Control group	53.2		0.8		29		24.65		3.53		0.7		40.28		24.21		5.66
Control group	56.9		0.5		24		31.65		7.56		1.2		31.25		21.56		8.95
Model group	82.3		0.7		26		3.1		6.07		0.5		55.44		24.82		6.39
Model group	78.5		0.9		80		6.88		8.17		0.6		46.32		30.57		12.02
Model group	62.8		0.4		30		15.74		10.52		0.6		75.88		23.23		15.14
Model group	57.9		0.7		26		17.63		16.46		0.7		67.52		30.85		10.62
Model group	55.6		0.2		34		5.37		12.46		0.6		46.23		20.95		15.14
Model group	61.6		0.4		25		19.57		18.97		0.6		49.73		27.37		27.71
Model group	58.6		0.6		30		9.9		9.69		0.8		65.02		39.09		9.33
Model group	59.7		0.5		30		22.28		19.11		0.9		49.04		33.16		10.45
Model group	61.7		1.1		50		10.61		4.78		0.8		45.57		28.61		14.23
Model group	63.4		0.8		42		5.45		10.97		0.5		52.34		27.98		14.23
Model group	55.1		0.6		27		14.16		10.26		0.5		26.93		16.27		9.88
Model group	70.5		0.7		27		8.23		12.41		0.6		67.13		26.83		7.85
Model group	71.7		0.4		36		27.59		12.41		0.45		71.02		22.9		8.47
Model group	53.2		0.7		32		8.56		11.65		0.9		61.25		30.12		13.12
Model group	56.9		0.4		30		9.42		10.56		0.8		36.27		25.64		8.56

## Sheet: Figure 4
	Figure 4A		Figure 4B		Figure 4C		Figure 4D		Figure 4E		Figure 4F
Groups	Interval between contractions during filling phase (s)		Contraction amplitude during filling phase (cmH2O)		Maximum infusion volume (ml)		Maximum pressure difference during filling phase (cmH2O)		Average bladder pressure during filling phase (cmH2O)		Amplitude of cessation of perfusion contraction (cmH2O)
Model group	3.1		6.07		0.5		46.41		24.82		6.39
Model group	15.74		10.52		0.6		65.66		23.23		15.14
Model group	5.37		12.46		0.6		35.61		20.95		15.14
Model group	9.9		9.69		0.8		27.13		39.09		9.33
Model group	10.61		4.78		0.8		30.2		28.61		14.23
Model group	8.23		12.41		0.6		56.93		26.83		7.85
Compound C group	13.32		9.4		1.05		33.67		26.28		14.8
Compound C group	19.7		10.55		1		64.21		25.15		13.39
Compound C group	25.9		14.03		0.9		39.24		25.67		12.32
Compound C group	21.12		25.75		0.8		37.31		29.43		15.78
Compound C group	16.28		9.68		0.7		46.62		25.33		5.96
Compound C group	16.39		13.23		0.5		45.42		22.83		9.94

## Sheet: Figure 5
HE staining
Immunohistochemical staining

## Sheet: Figure 6
Raw metabolomics data for Figure 6, see Supplemental File

## Sheet: Figure 7
Raw metabolomics data for Figure 7, see Supplemental File

## Sheet: Figure 8
Raw metabolomics data for Figure 8, see Supplemental File

## Sheet: Figure 9
Gray values of TRPV1, CaMKK2, AMPK, p-AMPK, and β-actin in different groups
Group/Gray value	Molecular weight (kDa)	con	mod	con	mod	con	mod
TRPV1	100	623.17	565.5	607.94	554.96	616.71	459.94
CaMKK2	55	753.26	1678.1	829.34	1748.6	812.66	1403.1
p-AMPK	62	198.9	430.78	165.75	332.99	134.81	365.1
AMPK	63	769.61	497.13	695.66	423.74	664.86	465.16
β-actin	42	2481.1	2457.2	2435.7	2312.4	2352.9	2318.6
TRPV1/β-actin		0.251167	0.23014	0.249596	0.239993	0.262106	0.19837
CaMKK2/β-actin		0.303599	0.682932	0.340493	0.756184	0.345387	0.60515
AMPK/β-actin		0.310189	0.202316	0.28561	0.183247	0.28257	0.200621
p-AMPK/β-actin		0.0801661	0.175313	0.0680503	0.144002	0.0572953	0.157466
